# Supplementary material for: Assessment of STAT5 as a potential therapy target in enzalutamide-resistant prostate cancer
Source: PLOS journal article supplement (doi:10.1371/journal.pone.0237248), 2020-08-13

S5 Figure: Analysis of the relative AR and STAT5 activity after treatment

**A**

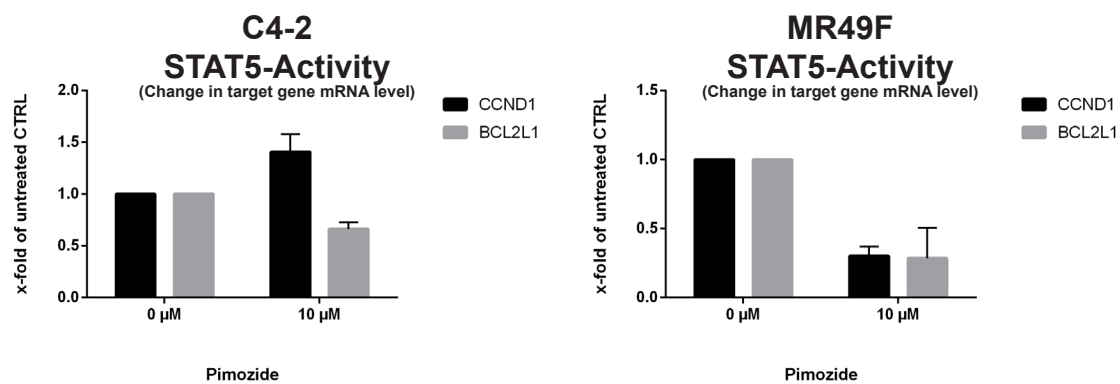

**B**

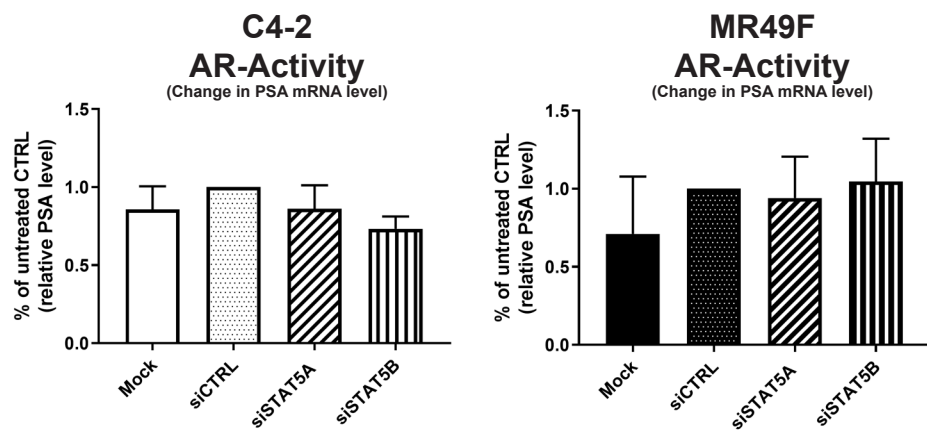

Supplement: S5 (10.1371/journal.pone.0237248.s005) [file journal.pone.0237248.s005]
